# Supplementary material
Source: Springer Nature journal article supplement (https://www.springermedizin.de/resource/supplementary/12958_2006_360_MOESM4_ESM.pdf/9567732)

## Inbred mouse strains

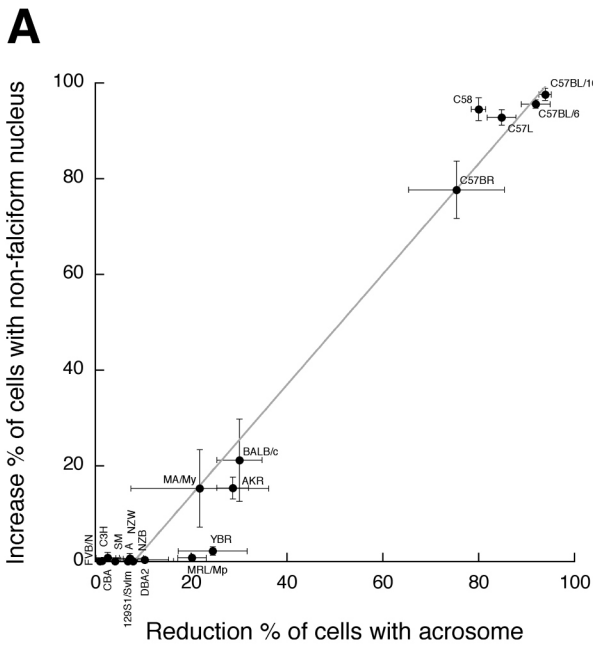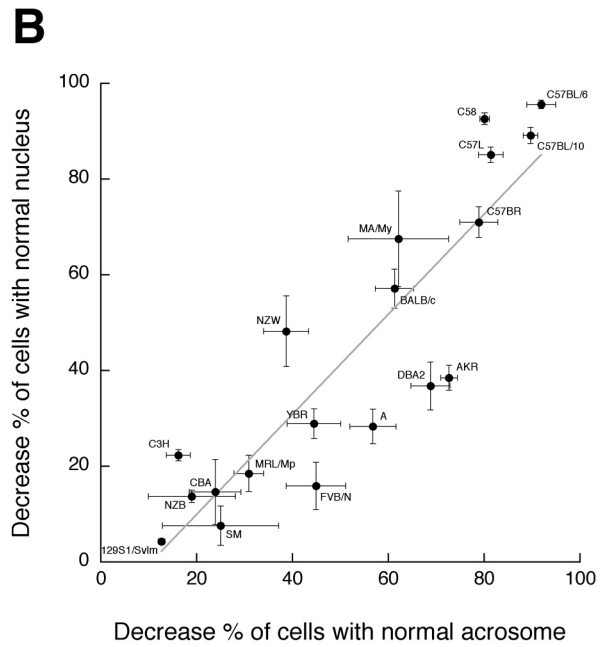

## C57BL/6 x FVB/N hybrid mice

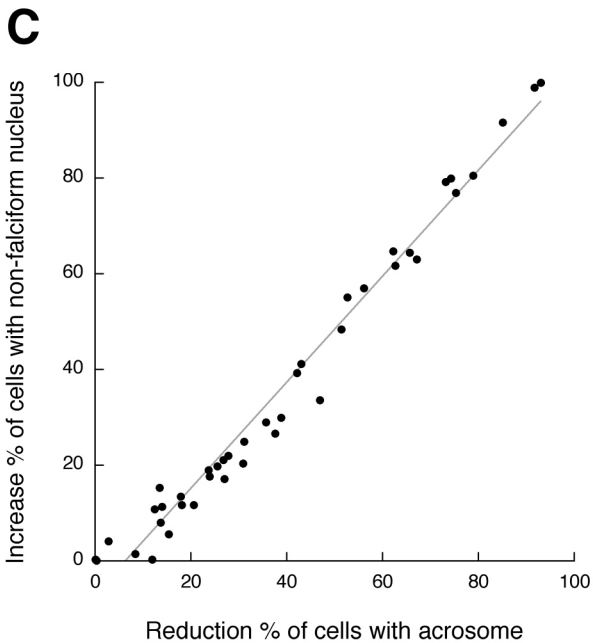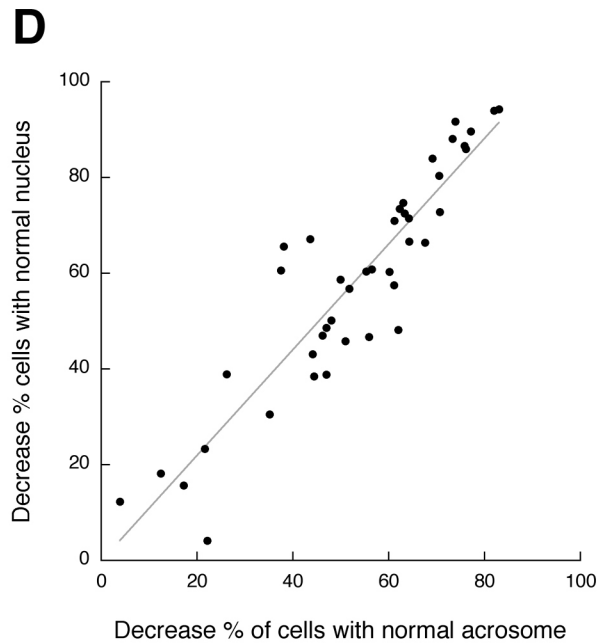

Supplement: MOESM4 [file 9567732]
